# Supplementary figures and images for: Sensory conflict disrupts circadian rhythms in the sea anemone Nematostella vectensis
Source: eLife journal article supplement (doi:10.7554/elife.81084), 2023-04-06

A)

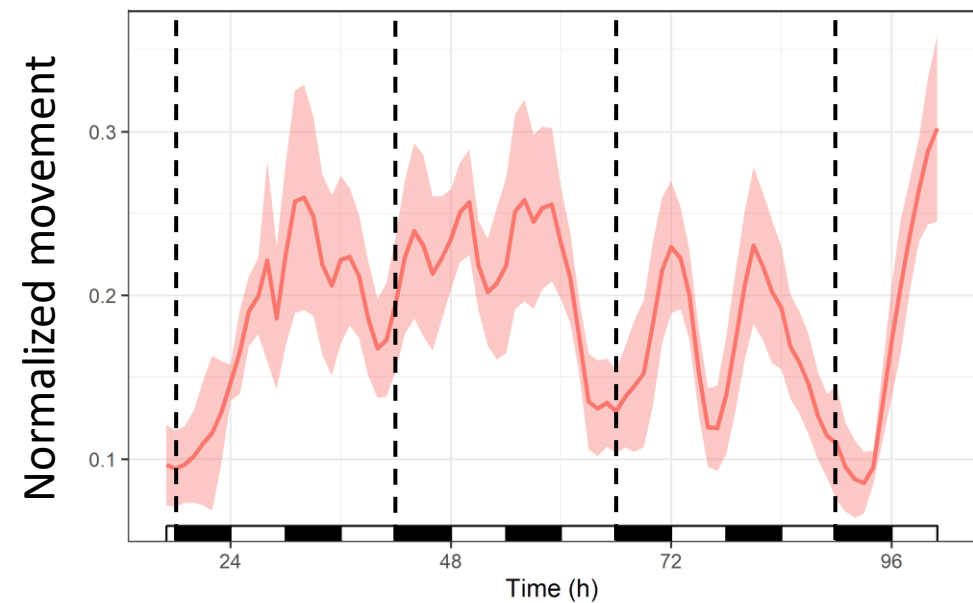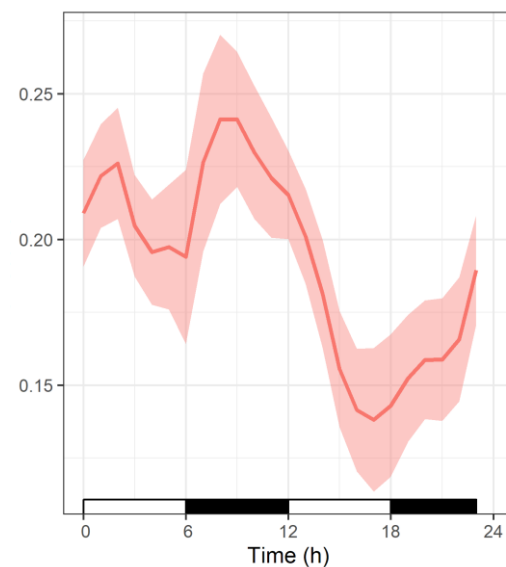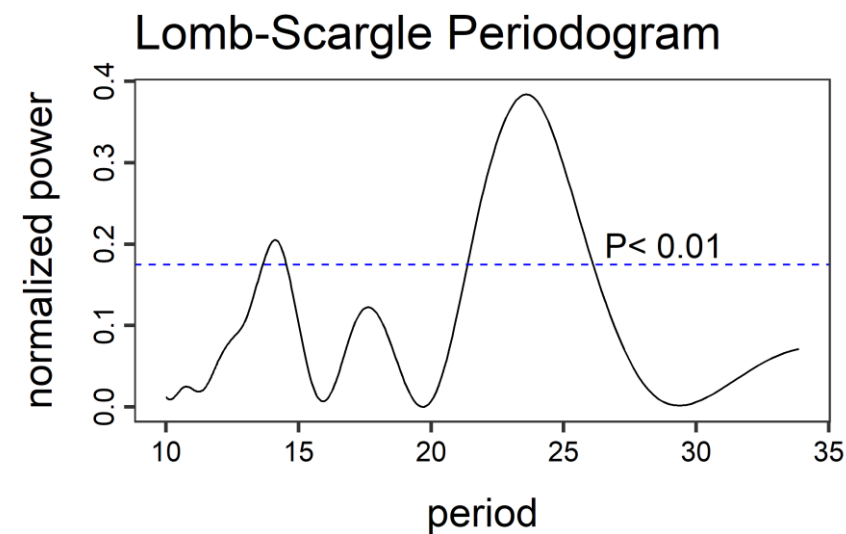

B)

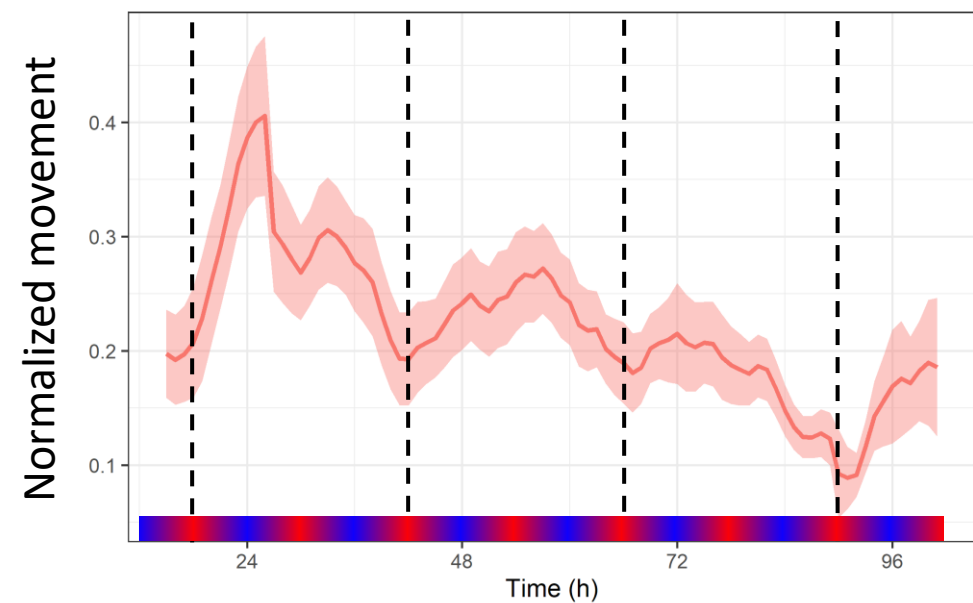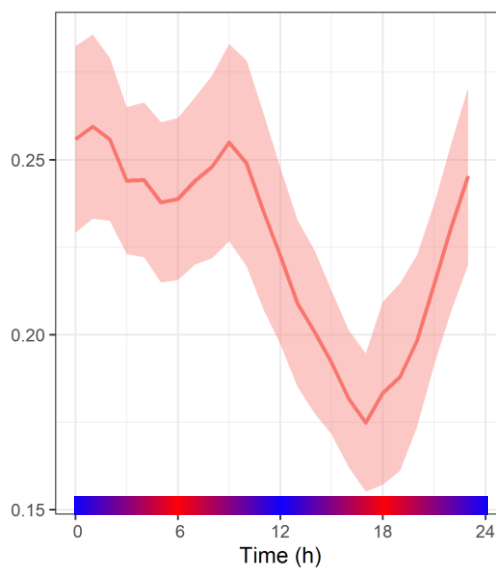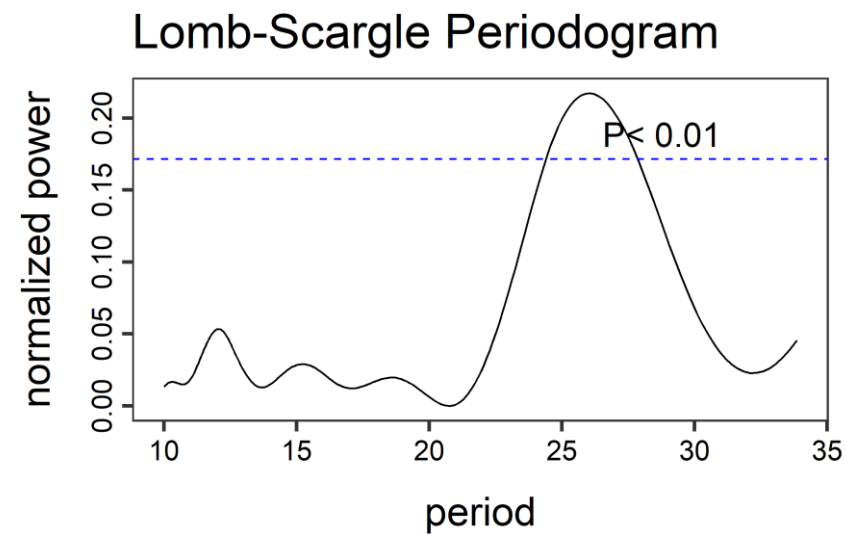

Supplement: supp [file elife-81084-supp-v1.zip]
